# Supplementary material
Source: HighWire-hosted journal article supplement (http://www.qdcxjkg.com/highwire/filestream/113427/field_highwire_adjunct_files/0/Supplementary_material_resubmission.pdf)
Supplement: Supplementary_material_resubmission.pdf [file Supplementary_material_resubmission.pdf]

## **Online Depository - Supplementary material**

### **Inclusion criteria and corticosteroid use in population 1 and 2**

In population 1, main inclusion criteria were: FEV<sub>1</sub> ≥1.2 L, absence of bronchiectasis, upper respiratory tract infection (e.g. colds) and/or use of antibiotics or oral corticosteroids within the last 2 months before inclusion. Only 36.8% (21/57) of subjects on ICS treatment had stopped ICS medication for a minimum of four weeks before entering the study.

In population 2, before testing, participants had to be in stable condition without any exacerbation in the last 6 weeks and subjects were allowed to use maintenance medication before testing. Subjects included in the lung function decline analysis required having FEV<sub>1</sub> measurements before and after the introduction of ICS, with a minimum of three FEV<sub>1</sub> measurements over a period of at least 2 years. Subjects who never used ICS were excluded from the performed analysis.

### **Bronchial biopsies**

After local anesthesia, at least 5 bronchial biopsies were obtained from the subsegmental carinas from the left or right lower lobe using a flexible bronchoscope (Olympus BF P20 or BF XT20). Biopsies were fixed in 4% formalin, processed and embedded in paraffin and cut in 3µm thick sections. Macroscopically the best biopsy was selected for processing. Quantification was performed on the largest of three biopsy sections. Morphological features were determined on sections stained with hematoxylin and eosin (HE) and with periodic acid Schiff. Immunohistochemical stainings (except for E-cadherin) were performed using the DAKO autostainer (DAKO, Glostrup, Denmark). The slides were included in a random fashion in each run to avoid group-wise staining. Immunohistochemistry was performed using antibodies

directed against CD8+T-cells (CD8, DAKO), CD31+endothelial cells (CD31, DAKO), eosinophilic peroxidase (EPX), epithelial adhesion (E-cadherin, BD Biosciences, Breda, the Netherlands). In short, sections were deparaffinized and after antigen retrieval, incubated with the primary antibodies. These antibodies were detected with Envision™ Detection Kit (DAKO) and the chromogen NovaRED (Vector Labs, Burlingame, USA). EPX was detected via biotinylated anti-mouse IgG1 (Southern Biotech), alkaline phosphatase-labeled conjugate (DAKO) and permanent Red (DAKO). E-cadherin were detected with two peroxidaselabelled conjugates (both DAKO) and 3,3'-Diaminobenzidine tetrahydrochloride (Sigma-Aldrich, Zwijndrecht, the Netherlands). All stainings were quantified by a blinded observer using computer-assisted image analysis at a magnification of 200x (Qwin, Leica Microsystems Imaging Solutions, Cambridge, UK). Inflammatory cell numbers were quantified by counting the number of positively stained cells in the submucosal area, 100µm under the basement membrane (BM), in a total area of 0.1mm<sup>2</sup> per biopsy sample. The number of CD31+ vessels in the submucosal area was counted in the whole section (excluding epithelium, muscle and mucus glands areas), hence we measured the number of vessels per area (0.1mm<sup>2</sup>). Epithelial layer integrity was assessed on HE-stained biopsy sections and expressed as the percentage of BM covered with 1) normal, intact epithelium (basal and ciliated columnar epithelial cells), 2) denuded epithelium (absence of basal and ciliated cells) and 3) metaplastic epithelium (multilayered epithelium covered by a flattened layer of squamous epithelial cells and absence of ciliated cells). The length of basement membrane was variable among patients with a minimum of 973µm. Epithelial adhesion was determined by assessment of the percentage of BM covered with E-cadherin+ intact epithelium. The (median [min-max]) length of basement membrane covered with intact epithelium analyzed in each biopsy was 605 [0-3147] µm. BM thickness was calculated based on computer-assisted measurements of BM surface area and BM length. Reproducibility of the

measurements was confirmed by a single observer performing repeated measurements in 10% of all cases.



**Table E1: Genotype distributions in population 1 and 2**

| CDH1 gene SNPs         | Location in gene | Alleles <sup>^</sup> | Population 1 |           |           | Population 2 |            |           |
|------------------------|------------------|----------------------|--------------|-----------|-----------|--------------|------------|-----------|
|                        |                  |                      | wt           | htz       | hmz       | wt           | htz        | hmz       |
|                        |                  |                      | n (%)        | n (%)     | n (%)     | n (%)        | n (%)      | n (%)     |
| rs2902185 <sup>G</sup> | Intron 2         | T:C                  | 81 (78.6)    | 22 (21.4) | 0 (0)     | 180 (78.6)   | 48 (21.0)  | 1 (0.4)   |
| rs11075699             | Intron 2         | A:G                  | 44 (32.1)    | 67 (48.9) | 26 (19.0) | 67 (27.0)    | 124 (50.0) | 57 (23.0) |
| rs1125557              | Intron 2         | A:G                  | 43 (32.1)    | 67 (50.0) | 24 (17.9) | 93 (39.1)    | 106 (44.5) | 39 (16.4) |
| rs12597188             | Intron 2         | G:A                  | 54 (39.7)    | 64 (47.1) | 18 (13.2) | 104 (41.9)   | 108 (43.5) | 36 (14.5) |
| rs7199991 <sup>G</sup> | Intron 2         | T:G                  | 50 (48.5)    | 43 (41.7) | 10 (9.7)  | 125 (54.6)   | 82 (35.8)  | 22 (9.6)  |
| rs7186053              | Intron 3         | G:A                  | 45 (32.8)    | 72 (52.6) | 20 (14.6) | 93 (37.2)    | 119 (47.6) | 38 (15.2) |
| rs10431924             | Intron 3         | C:T                  | 34 (24.8)    | 75 (54.7) | 28 (20.4) | 83 (33.9)    | 113 (46.1) | 49 (20.0) |
| rs4783573              | Intron 3         | A:G                  | 56 (41.2)    | 64 (47.1) | 16 (11.8) | 107 (43.5)   | 112 (45.5) | 27 (11.0) |
| rs7188750 <sup>G</sup> | Intron 5         | G:A                  | 69 (67.0)    | 29 (28.2) | 5 (4.9)   | 166(72.5)    | 56 (24.5)  | 7 (3.1)   |
| rs8056633              | Intron 9         | T:G                  | 72 (53.7)    | 56 (41.8) | 6 (4.5)   | 137 (55.7)   | 90 (36.6)  | 19 (7.7)  |
| rs4783689              | Intron11         | C:T                  | 46 (33.8)    | 64 (47.1) | 26 (19.1) | 66 (26.6)    | 121 (48.8) | 61 (24.6) |
| rs16958383             | Intron12         | G:A                  | 94 (69.1)    | 38 (27.9) | 4 (2.9)   | 183 (73.8)   | 58 (23.4)  | 7 (2.8)   |
| rs2276330 <sup>G</sup> | Intron12         | T:C                  | 75 (72.8)    | 24 (23.3) | 4 (3.9)   | 177 (77.3)   | 50 (21.8)  | 2 (0,9)   |
| rs1801552 <sup>G</sup> | Exon13           | C:T                  | 46 (44.7)    | 48 (46.6) | 9 (8.7)   | 116 (50.7)   | 91 (39.7)  | 22 (9.6)  |
| rs3785078              | Intron14         | A:C                  | 101 (75.4)   | 31 (23.1) | 2 (1.5)   | 186 (75.0)   | 59 (23.8)  | 3 (1.2)   |
| rs7203904              | Intron14         | G:C                  | 70 (51.1)    | 58 (42.3) | 9 (6.6)   | 133 (53.8)   | 91 (36.8)  | 23 (9.3)  |
| rs17690554             | 3' UTR           | C:G                  | 86 (62.8)    | 47 (34.3) | 4 (2.9)   | 145 (58.9)   | 89 (36.8)  | 12 (4.9)  |

<sup>^</sup>major allele first, <sup>G</sup> Genotyped in genome wide association study (GWAS) on asthma

SNPs= single nucleotide polymorphisms, wt: wild types, htz: heterozygotes and hmz: homozygotes mutant

**Table E2: Associations of *CDH1* genotypes with epithelial E-cadherin expression in ICS and no ICS group**

| <i>CDH1</i> gene SNPs |       | % epithelial E-cadherin expression <sup>#</sup> |        |                 |     |        |                 |
|-----------------------|-------|-------------------------------------------------|--------|-----------------|-----|--------|-----------------|
|                       |       | no ICS                                          |        |                 | ICS |        |                 |
|                       |       | N                                               | MEDIAN | <sup>\$</sup> P | N   | MEDIAN | <sup>\$</sup> P |
| rs2902185             | TT    | 36                                              | 100    | 0.09            | 40  | 79     | 0.51            |
|                       | TC/CC | 15                                              | 66     |                 | 7   | 59     |                 |
| rs11075699            | AA    | 17                                              | 79     | 0.31            | 23  | 72     | 0.15            |
|                       | AG/GG | 54                                              | 100    |                 | 33  | 83     |                 |
| rs1125557             | AA    | 20                                              | 98     | 0.75            | 21  | 80     | 0.85            |
|                       | AG/GG | 49                                              | 100    |                 | 34  | 89     |                 |
| rs12597188            | GG    | 30                                              | 98     | 0.61            | 22  | 81     | 0.88            |
|                       | AG/AA | 41                                              | 100    |                 | 33  | 82     |                 |
| rs7199991             | AA    | 28                                              | 96     | 0.27            | 21  | 82     | 0.39            |
|                       | AC/CC | 23                                              | 100    |                 | 26  | 71     |                 |
| rs7186053             | GG    | 25                                              | 87     | 0.15            | 18  | 79     | 0.99            |
|                       | GA/AA | 46                                              | 100    |                 | 38  | 88     |                 |
| rs10431924            | CC    | 16                                              | 76     | 0.10            | 16  | 81     | 0.65            |
|                       | CT/TT | 55                                              | 100    |                 | 40  | 83     |                 |
| rs4783573             | AA    | 30                                              | 100    | 0.84            | 20  | 75     | 0.33            |
|                       | AG/GG | 40                                              | 100    |                 | 36  | 85     |                 |
| rs7188750             | GG    | 35                                              | 100    | 0.11            | 30  | 78     | 0.95            |
|                       | GA/AA | 16                                              | 79     |                 | 17  | 80     |                 |
| rs8056633             | TT    | 41                                              | 100    | <b>0.04*</b>    | 26  | 78     | 0.57            |
|                       | TG/GG | 28                                              | 83     |                 | 29  | 82     |                 |
| rs4783689             | CC    | 31                                              | 91     | 0.20            | 11  | 78     | 0.50            |
|                       | CT/TT | 39                                              | 100    |                 | 45  | 82     |                 |
| rs16958383            | GG    | 49                                              | 100    | <b>0.01*</b>    | 38  | 82     | 0.99            |
|                       | GA/AA | 21                                              | 52     |                 | 18  | 79     |                 |
| rs2276330             | TT    | 38                                              | 100    | <b>0.049*</b>   | 33  | 78     | 0.43            |
|                       | TC/CC | 13                                              | 67     |                 | 14  | 84     |                 |
| rs1801552             | CC    | 19                                              | 100    | 0.70            | 26  | 79     | 0.67            |
|                       | CT/TT | 32                                              | 100    |                 | 21  | 79     |                 |
| rs3785078             | AA    | 55                                              | 100    | <b>0.03*</b>    | 39  | 83     | 0.95            |
|                       | AC/CC | 14                                              | 54     |                 | 16  | 79     |                 |
| rs7203904             | GG    | 39                                              | 100    | <b>0.04*</b>    | 27  | 78     | 0.44            |
|                       | GC/CC | 32                                              | 82     |                 | 29  | 83     |                 |
| rs17690554            | CC    | 48                                              | 100    | 0.11            | 32  | 79     | 0.36            |
|                       | CG/GG | 23                                              | 86     |                 | 24  | 82     |                 |

\*p value<0.05, <sup>\$</sup> significance tested with Mann–Whitney *U* test, <sup>#</sup> percentage of basement membrane covered with E-cadherin-positive stained intact epithelium, N= number of subjects



**Table E3.1: Associations of *CDH1* genotypes with basement membrane thickness in ICS and no ICS group**

| <i>CDH1</i> gene SNPs |       | Basement membrane thickness (µm) |              |      |              |                      |              |                                         |                      |               |
|-----------------------|-------|----------------------------------|--------------|------|--------------|----------------------|--------------|-----------------------------------------|----------------------|---------------|
|                       |       | no ICS                           |              |      | ICS          |                      |              | Difference (ICS vs no ICS) <sup>#</sup> |                      |               |
|                       |       | B                                | 95% CI       | P    | B            | 95% CI               | P            | B                                       | 95% CI               | P             |
| rs2902185             | TC/CC | -0.63                            | (-1.59;0.32) | 0.19 | 1.05         | (-0.21;2.31)         | 0.10         | <b>1.68</b>                             | <b>(0.12;3.25)</b>   | <b>0.036*</b> |
| rs11075699            | AG    | 0.05                             | (-0.72;0.83) | 0.89 | 0.60         | (-0.29;1.49)         | 0.18         | 0.55                                    | (-0.62;1.72)         | 0.35          |
|                       | GG    | -0.12                            | (-1.17;0.92) | 0.82 | -0.02        | (-1.07;1.04)         | 0.98         | 0.11                                    | (-1.37;1.59)         | 0.89          |
| rs1125557             | AG    | -0.67                            | (-1.48;0.13) | 0.10 | 0.50         | (-0.38;1.39)         | 0.27         | 1.17                                    | (-0.03;2.37)         | 0.05          |
|                       | GG    | -0.23                            | (-1.31;0.86) | 0.68 | 0.22         | (-0.84;1.27)         | 0.69         | 0.44                                    | (-1.07;1.95)         | 0.56          |
| rs12597188            | GA/AA | -0.06                            | (-0.74;0.63) | 0.87 | 0.03         | (-0.76;0.82)         | 0.94         | 0.06                                    | (-0.96;1.20)         | 0.87          |
| rs7199991             | AC/CC | -0.14                            | (-1.01;0.73) | 0.75 | -0.25        | (-1.17;0.67)         | 0.59         | -0.11                                   | (-1.39;1.16)         | 0.86          |
| rs7186053             | GA/AA | -0.45                            | (-1.17;0.27) | 0.22 | 0.17         | (-0.65;1.00)         | 0.68         | 0.62                                    | (-0.48;1.72)         | 0.26          |
| rs10431924            | CT    | -0.73                            | (-1.58;0.12) | 0.09 | 0.04         | (-0.87;0.95)         | 0.93         | 0.77                                    | (-0.49;2.03)         | 0.23          |
|                       | TT    | -0.65                            | (-1.72;0.43) | 0.24 | 0.22         | (-0.85;1.28)         | 0.69         | 0.86                                    | (-0.65;2.37)         | 0.26          |
| rs4783573             | AG/GG | 0.31                             | (-0.37;1.00) | 0.36 | -0.04        | (-0.86;0.78)         | 0.92         | -0.35                                   | (-1.43;0.73)         | 0.52          |
| rs7188750             | GA/AA | -0.15                            | (-1.08;0.77) | 0.75 | -0.86        | (-1.79;0.08)         | 0.07         | -0.71                                   | (-2.03;0.61)         | 0.29          |
| rs8056633             | TG/GG | -0.56                            | (-1.22;0.11) | 0.10 | -0.67        | (-1.43;0.09)         | 0.09         | -0.11                                   | (-1.13;0.90)         | 0.83          |
| rs4783689             | CT    | 0.03                             | (-0.73;0.79) | 0.94 | 0.04         | (-1.00;1.07)         | 0.94         | 0.01                                    | (-1.27;1.29)         | 0.99          |
|                       | TT    | 0.11                             | (-0.81;1.03) | 0.81 | 0.33         | (-0.98;1.65)         | 0.62         | 0.22                                    | (-1.41;1.85)         | 0.79          |
| rs16958383            | GA/AA | -0.25                            | (-0.97;0.46) | 0.48 | <b>-1.05</b> | <b>(-1.86;-0.24)</b> | <b>0.01*</b> | -0.79                                   | (-1.88;0.29)         | 0.15          |
| rs2276330             | TC/CC | 0.09                             | (-0.90;1.08) | 0.86 | <b>-1.08</b> | <b>(-2.07;-0.09)</b> | <b>0.03*</b> | -1.17                                   | (-2.60;0.26)         | 0.11          |
| rs1801552             | CT/TT | -0.55                            | (-1.44;0.34) | 0.22 | 0.57         | (-0.33;1.48)         | 0.21         | 1.12                                    | (-0.14;2.38)         | 0.08          |
| rs3785078             | AC/CC | 0.24                             | (-0.57;1.05) | 0.56 | <b>-1.05</b> | <b>(-1.88;-0.22)</b> | <b>0.01*</b> | <b>-1.29</b>                            | <b>(-2.44;-0.13)</b> | <b>0.03*</b>  |
| rs7203904             | GC/CC | -0.14                            | (-0.81;0.53) | 0.68 | -0.63        | (-1.40;0.14)         | 0.11         | -0.49                                   | (-1.51;0.54)         | 0.35          |
| rs17690554            | CG/GG | -0.07                            | (-0.77;0.63) | 0.84 | <b>-1.00</b> | <b>(-1.76;-0.24)</b> | <b>0.01*</b> | -0.93                                   | (-1.97;0.11)         | 0.08          |

\*p value<0.05, <sup>#</sup>Difference= interaction of ICS with SNP



**Table E3.2: Associations of *CDH1* genotypes with subepithelial vasculature in ICS and no ICS group**

| <i>CDH1</i> gene SNPs |       | Number of CD31+vessels per 0.1mm <sup>2</sup> of submucosal area |              |      |              |                       |               |                                         |                       |              |
|-----------------------|-------|------------------------------------------------------------------|--------------|------|--------------|-----------------------|---------------|-----------------------------------------|-----------------------|--------------|
|                       |       | no ICS                                                           |              |      | ICS          |                       |               | Difference (ICS vs no ICS) <sup>#</sup> |                       |              |
|                       |       | B                                                                | 95% CI       | P    | B            | 95% CI                | P             | B                                       | 95% CI                | P            |
| rs2902185             | TC/CC | 0.66                                                             | (-4.51;5.82) | 0.80 | -1.01        | (-7.88;5.85)          | 0.77          | -1.67                                   | (-10.18;6.84)         | 0.70         |
| rs11075699            | AG    | 1.20                                                             | (-2.94;5.34) | 0.57 | 3.25         | (-1.56;8.07)          | 0.18          | 2.05                                    | (-4.25;8.35)          | 0.52         |
|                       | GG    | 2.53                                                             | (-2.93;7.99) | 0.36 | 3.05         | (-2.62;8.71)          | 0.29          | 0.52                                    | (-7.35;8.38)          | 0.90         |
| rs1125557             | AG    | -1.70                                                            | (-5.95;2.55) | 0.43 | 3.93         | (-0.84;8.69)          | 0.11          | 5.63                                    | (-0.79;12.04)         | 0.09         |
|                       | GG    | -0.84                                                            | (-6.64;4.96) | 0.78 | 2.93         | (-2.92;8.78)          | 0.32          | 3.77                                    | (-4.43;11.97)         | 0.36         |
| rs12597188            | GA/AA | 2.06                                                             | (-1.56;5.69) | 0.26 | 4.08         | (-0.16;8.32)          | 0.06          | 2.02                                    | (-3.52;7.56)          | 0.47         |
| rs7199991             | AC/CC | 0.02                                                             | (-4.57;4.62) | 0.99 | 3.22         | (-1.67;8.11)          | 0.19          | 3.20                                    | (-3.54;9.93)          | 0.35         |
| rs7186053             | GA/AA | 1.56                                                             | (-2.28;5.37) | 0.42 | 2.02         | (-2.42;6.46)          | 0.37          | 0.47                                    | (-5.41;6.34)          | 0.88         |
| rs10431924            | CT    | -0.91                                                            | (-5.41;3.59) | 0.69 | 0.81         | (-4.19;5.82)          | 0.75          | 1.72                                    | (-5.05;8.50)          | 0.62         |
|                       | TT    | -0.28                                                            | (-6.04;5.48) | 0.92 | 0.55         | (-5.22;6.31)          | 0.85          | 0.83                                    | (-7.27;8.92)          | 0.84         |
| rs4783573             | AG/GG | 0.64                                                             | (-3.00;4.27) | 0.73 | 1.73         | (-2.71;6.16)          | 0.44          | 1.09                                    | (-4.73;6.91)          | 0.71         |
| rs7188750             | GA/AA | -3.18                                                            | (-7.93;1.56) | 0.19 | <b>-6.92</b> | <b>(-11.75;-2.09)</b> | <b>0.005*</b> | -3.73                                   | (-10.54;3.07)         | 0.28         |
| rs8056633             | TG/GG | -2.82                                                            | (-6.37;0.72) | 0.12 | <b>-4.65</b> | <b>(-8.81;-0.49)</b>  | <b>0.03*</b>  | -1.82                                   | (-7.30;3.65)          | 0.51         |
| rs4783689             | CT    | 0.04                                                             | (-3.93;4.01) | 0.98 | 3.86         | (-1.77;9.49)          | 0.18          | 3.82                                    | (-3.06;10.69)         | 0.27         |
|                       | TT    | 2.37                                                             | (-2.48;7.22) | 0.33 | 5.57         | (-1.49;12.62)         | 0.12          | 3.19                                    | (-5.49;11.88)         | 0.47         |
| rs16958383            | GA/AA | -3.41                                                            | (-7.19;0.37) | 0.08 | <b>-6.11</b> | <b>(-10.40;-1.83)</b> | <b>0.005*</b> | -2.70                                   | (-8.43;3.03)          | 0.35         |
| rs2276330             | TC/CC | 1.29                                                             | (-3.92;6.49) | 0.63 | <b>-6.94</b> | <b>(-12.15;-1.73)</b> | <b>0.01*</b>  | <b>-8.22</b>                            | <b>(-15.73;-0.71)</b> | <b>0.03*</b> |
| rs1801552             | CT/TT | -0.63                                                            | (-5.41;4.15) | 0.79 | 0.65         | (-4.28;5.59)          | 0.79          | 1.28                                    | (-5.53;8.09)          | 0.71         |
| rs3785078             | AC/CC | -0.91                                                            | (-5.26;3.45) | 0.68 | <b>-6.61</b> | <b>(-11.09;-2.13)</b> | <b>0.004*</b> | -5.71                                   | (-11.93;0.52)         | 0.07         |
| rs7203904             | GC/CC | -2.27                                                            | (-5.76;1.23) | 0.20 | <b>-4.66</b> | <b>(-8.78;-0.54)</b>  | <b>0.03*</b>  | -2.39                                   | (-7.84;3.05)          | 0.39         |
| rs17690554            | CG/GG | -0.19                                                            | (-3.97;3.59) | 0.92 | -2.83        | (-7.02;1.35)          | 0.18          | -2.64                                   | (-8.31;3.03)          | 0.36         |

\*p value<0.05, <sup>#</sup>Difference= interaction of ICS with SNP

Table E4.1: Association of *CDH1* genotypes with CD8+T-cells in ICS and no ICS group

| <i>CDH1</i> gene SNPs |       | Number of CD8+T-cells per 0.1mm <sup>2</sup> of submucosal area (log-transformed) |              |      |              |                      |              |                                         |                      |               |
|-----------------------|-------|-----------------------------------------------------------------------------------|--------------|------|--------------|----------------------|--------------|-----------------------------------------|----------------------|---------------|
|                       |       | no ICS                                                                            |              |      | ICS          |                      |              | Difference (ICS vs no ICS) <sup>#</sup> |                      |               |
|                       |       | B                                                                                 | 95% CI       | P    | B            | 95% CI               | P            | B                                       | 95% CI               | P             |
| rs2902185             | TC/CC | -0.04                                                                             | (-0.67;0.59) | 0.90 | -0.03        | (-0.86;0.80)         | 0.94         | 0.01                                    | (-1.02;1.04)         | 0.99          |
| rs11075699            | AG    | -0.02                                                                             | (-0.53;0.49) | 0.93 | <b>0.62</b>  | <b>(0.03;1.22)</b>   | <b>0.04*</b> | 0.65                                    | (-0.13;1.42)         | 0.10          |
|                       | GG    | -0.37                                                                             | (-1.04;0.31) | 0.28 | -0.09        | (-0.79;0.60)         | 0.79         | 0.28                                    | (-0.69;1.25)         | 0.57          |
| rs1125557             | AG    | 0.47                                                                              | (-0.04;0.99) | 0.07 | 0.36         | (-0.22;0.94)         | 0.22         | -0.12                                   | (-0.89;0.66)         | 0.77          |
|                       | GG    | 0.30                                                                              | (-0.40;1.00) | 0.39 | <b>-0.73</b> | <b>(-1.42;-0.05)</b> | <b>0.04*</b> | <b>-1.04</b>                            | <b>(-2.02;-0.06)</b> | <b>0.04*</b>  |
| rs12597188            | GA/AA | 0.39                                                                              | (-0.06;0.84) | 0.09 | -0.12        | (-0.64;0.41)         | 0.66         | -0.51                                   | (-1.20;0.18)         | 0.14          |
| rs7199991             | AC/CC | 0.38                                                                              | (-0.17;0.94) | 0.17 | -0.29        | (-0.88;0.29)         | 0.32         | -0.68                                   | (-1.48;0.13)         | 0.10          |
| rs7186053             | GA/AA | 0.48                                                                              | (0.00;0.95)  | 0.05 | 0.13         | (-0.43;0.68)         | 0.65         | -0.35                                   | (-1.08;0.38)         | 0.35          |
| rs10431924            | CT    | 0.24                                                                              | (-0.31;0.79) | 0.40 | 0.53         | (-0.08;1.14)         | 0.09         | 0.29                                    | (-0.53;1.12)         | 0.49          |
|                       | TT    | 0.32                                                                              | (-0.39;1.02) | 0.37 | -0.26        | (-0.96;0.45)         | 0.47         | -0.57                                   | (-1.56;0.42)         | 0.25          |
| rs4783573             | AG/GG | 0.00                                                                              | (-0.46;0.46) | 0.99 | 0.02         | (-0.54;0.57)         | 0.96         | 0.01                                    | (-0.72;0.74)         | 0.97          |
| rs7188750             | GA/AA | -0.51                                                                             | (-1.10;0.08) | 0.09 | 0.53         | (-0.07;1.12)         | 0.08         | <b>1.04</b>                             | <b>(0.20;1.87)</b>   | <b>0.02*</b>  |
| rs8056633             | TG/GG | -0.15                                                                             | (-0.61;0.32) | 0.53 | 0.05         | (-0.49;0.59)         | 0.86         | 0.19                                    | (-0.52;0.90)         | 0.59          |
| rs4783689             | CT    | -0.08                                                                             | (-0.57;0.42) | 0.76 | -0.65        | (-1.34;0.03)         | 0.06         | -0.58                                   | (-1.42;0.27)         | 0.18          |
|                       | TT    | 0.42                                                                              | (-0.18;1.03) | 0.17 | -0.42        | (-1.28;0.45)         | 0.34         | -0.84                                   | (-1.91;0.23)         | 0.12          |
| rs16958383            | GA/AA | -0.30                                                                             | (-0.79;0.19) | 0.23 | 0.30         | (-0.26;0.87)         | 0.29         | 0.60                                    | (-0.15;1.35)         | 0.11          |
| rs2276330             | TC/CC | -0.60                                                                             | (-1.22;0.03) | 0.06 | <b>0.80</b>  | <b>(0.18;1.42)</b>   | <b>0.01*</b> | <b>1.40</b>                             | <b>(0.51;2.30)</b>   | <b>0.003*</b> |
| rs1801552             | CT/TT | -0.47                                                                             | (-1.04;0.10) | 0.11 | 0.05         | (-0.53;0.64)         | 0.85         | 0.53                                    | (-0.29;1.34)         | 0.20          |
| rs3785078             | AC/CC | -0.11                                                                             | (-0.66;0.45) | 0.70 | 0.36         | (-0.22;0.94)         | 0.23         | 0.47                                    | (-0.33;1.27)         | 0.25          |
| rs7203904             | GC/CC | -0.08                                                                             | (-0.53;0.37) | 0.73 | 0.24         | (-0.29;0.77)         | 0.38         | 0.32                                    | (-0.38;1.01)         | 0.37          |
| rs17690554            | CG/GG | 0.01                                                                              | (-0.46;0.48) | 0.97 | 0.44         | (-0.09;0.97)         | 0.10         | 0.43                                    | (-0.28;1.14)         | 0.24          |

\*p value<0.05, #Difference= interaction of ICS with SNPs

**Table E4.2: Association of *CDH1* genotypes with eosinophilic peroxidase (EPX)+cells in ICS and no ICS group**

| <i>CDH1</i> gene SNPs |       | Number of EPX+cells per 0.1mm <sup>2</sup> of submucosal area (log-transformed) |              |      |             |                    |              |                                         |                    |              |
|-----------------------|-------|---------------------------------------------------------------------------------|--------------|------|-------------|--------------------|--------------|-----------------------------------------|--------------------|--------------|
|                       |       | No ICS                                                                          |              |      | ICS         |                    |              | Difference (ICS vs no ICS) <sup>#</sup> |                    |              |
|                       |       | B                                                                               | 95% CI       | P    | B           | 95% CI             | P            | B                                       | 95% CI             | P            |
| rs2902185             | TC/CC | -0.01                                                                           | (-0.65;0.63) | 0.97 | <b>0.94</b> | <b>(0.11;1.77)</b> | <b>0.03*</b> | 0.95                                    | (-0.09;1.99)       | 0.07         |
| rs11075699            | AG    | 0.06                                                                            | (-0.50;0.61) | 0.84 | -0.16       | (-0.79;0.47)       | 0.61         | -0.22                                   | (-1.05;0.61)       | 0.60         |
|                       | GG    | -0.06                                                                           | (-0.78;0.67) | 0.87 | -0.49       | (-1.23;0.26)       | 0.20         | -0.43                                   | (-1.47;0.61)       | 0.41         |
| rs1125557             | AG    | -0.01                                                                           | (-0.57;0.54) | 0.96 | 0.40        | (-0.22;1.03)       | 0.21         | 0.42                                    | (-0.43;1.26)       | 0.33         |
|                       | GG    | -0.19                                                                           | (-0.95;0.57) | 0.63 | 0.56        | (-0.18;1.31)       | 0.14         | 0.75                                    | (-0.31;1.81)       | 0.16         |
| rs12597188            | GA/AA | 0.12                                                                            | (-0.37;0.62) | 0.62 | 0.21        | (-0.36;0.78)       | 0.46         | 0.09                                    | (-0.66;0.83)       | 0.82         |
| rs7199991             | AC/CC | 0.04                                                                            | (-0.54;0.63) | 0.88 | 0.07        | (-0.54;0.67)       | 0.83         | 0.02                                    | (-0.82;0.86)       | 0.96         |
| rs7186053             | GA/AA | 0.05                                                                            | (-0.46;0.55) | 0.85 | 0.43        | (-0.15;1.01)       | 0.14         | 0.38                                    | (-0.39;1.15)       | 0.33         |
| rs10431924            | CT    | -0.09                                                                           | (-0.68;0.49) | 0.75 | 0.03        | (-0.61;0.67)       | 0.93         | 0.12                                    | (-0.74;0.99)       | 0.78         |
|                       | TT    | -0.29                                                                           | (-1.03;0.45) | 0.44 | <b>0.81</b> | <b>(0.07;1.55)</b> | <b>0.03*</b> | <b>1.09</b>                             | <b>(0.05;2.14)</b> | <b>0.04*</b> |
| rs4783573             | AG/GG | 0.10                                                                            | (-0.38;0.58) | 0.68 | -0.33       | (-0.91;0.24)       | 0.26         | -0.43                                   | (-1.19;0.33)       | 0.26         |
| rs7188750             | GA/AA | -0.24                                                                           | (-0.86;0.38) | 0.45 | 0.21        | (-0.42;0.83)       | 0.51         | 0.44                                    | (-0.44;1.33)       | 0.32         |
| rs8056633             | TG/GG | -0.17                                                                           | (-0.65;0.31) | 0.49 | -0.04       | (-0.59;0.51)       | 0.89         | 0.13                                    | (-0.61;0.86)       | 0.73         |
| rs4783689             | CT    | -0.02                                                                           | (-0.55;0.51) | 0.94 | 0.46        | (-0.27;1.18)       | 0.21         | 0.48                                    | (-0.42;1.37)       | 0.29         |
|                       | TT    | 0.14                                                                            | (-0.50;0.78) | 0.66 | 0.74        | (-0.17;1.66)       | 0.11         | 0.60                                    | (-0.54;1.74)       | 0.30         |
| rs16958383            | GA/AA | -0.38                                                                           | (-0.90;0.14) | 0.15 | 0.16        | (-0.42;0.75)       | 0.58         | 0.55                                    | (-0.24;1.33)       | 0.17         |
| rs2276330             | TC/CC | -0.20                                                                           | (-0.87;0.48) | 0.57 | 0.29        | (-0.38;0.95)       | 0.39         | 0.48                                    | (-0.48;1.45)       | 0.32         |
| rs1801552             | CT/TT | -0.33                                                                           | (-0.92;0.27) | 0.28 | -0.16       | (-0.77;0.44)       | 0.60         | 0.16                                    | (-0.68;1.00)       | 0.70         |
| rs3785078             | AC/CC | 0.13                                                                            | (-0.46;0.73) | 0.66 | -0.01       | (-0.62;0.59)       | 0.96         | -0.15                                   | (-1.00;0.70)       | 0.73         |
| rs7203904             | GC/CC | -0.17                                                                           | (-0.65;0.31) | 0.48 | -0.06       | (-0.61;0.49)       | 0.84         | 0.11                                    | (-0.62;0.84)       | 0.76         |
| rs17690554            | CG/GG | 0.15                                                                            | (-0.35;0.65) | 0.56 | -0.01       | (-0.56;0.54)       | 0.97         | -0.16                                   | (-0.91;0.59)       | 0.68         |

\*p value<0.05, <sup>#</sup>Difference= interaction of ICS with SNPs



**Table E5: Effect of *CDH1* genotypes on annual change in lung function before and after the introduction of ICS**

| <i>CDH1</i> gene SNPs |                  | FEV <sub>1</sub> annual change in population 2 (ml/year) |                                            |                  |                     |                                                        |                                |                                         |                                                |                      |
|-----------------------|------------------|----------------------------------------------------------|--------------------------------------------|------------------|---------------------|--------------------------------------------------------|--------------------------------|-----------------------------------------|------------------------------------------------|----------------------|
|                       |                  | no ICS                                                   |                                            |                  | ICS                 |                                                        |                                | Difference (ICS vs no ICS) <sup>#</sup> |                                                |                      |
|                       |                  | Annual change in WT                                      | Difference in annual change compared to WT |                  | Annual change in WT | Difference in annual change compared to WT             |                                | Annual change in WT                     | Difference in annual change compared to WT     |                      |
|                       | <b>B (95%CI)</b> | <b>P</b>                                                 |                                            | <b>B (95%CI)</b> | <b>P</b>            |                                                        | <b>B (95%CI)</b>               | <b>P</b>                                |                                                |                      |
| rs2902185             | TT<br>TC/CC      | -21.6                                                    | -17.5 (-38.8;3.8)                          | 0.11             | -17.4               | -3.7 (-16.40;8.96)                                     | 0.57                           | 4.1                                     | 13.7 (-10.4;37.9)                              | 0.26                 |
| rs11075699            | AA<br>AG<br>GG   | -25.9                                                    | -1.3 (-20.6;18.1)<br>1.8 (-20.8;24.5)      | 0.90<br>0.87     | -20.3               | 1.0 (-11.77;13.74)<br>7.67 (-8.33;23.68)               | 0.35<br>0.38                   | 5.5                                     | 2.2 (-20.1;24.6)<br>5.9 (-21.1;32.8)           | 0.84<br>0.67         |
| rs1125557             | AA<br>AG<br>GG   | -22.7                                                    | -5.4 (-21.8;11.1)<br>-1.1 (-24.2;22.0)     | 0.52<br>0.93     | -7.6                | <b>-19.7 (-32.0;-7.4)</b><br><b>-17.6 (-33.0;-2.3)</b> | <b>0.002*</b><br><b>0.024*</b> | -7.6                                    | -14.3 (-34.5;5.9)<br>-16.6 (-43.7;10.6)        | 0.16<br>0.23         |
| rs12597188            | GG<br>GA<br>AA   | -23.2                                                    | -6.5 (-22.8;9.7)<br>-3.2 (-25.0;18.5)      | 0.43<br>0.77     | -17.1               | -1.6 (-13.8;10.7)<br>-2.2 (-18.0;13.7)                 | 0.80<br>0.79                   | 6.2                                     | 5.0 (-14.7;24.6)<br>1.1 (-25.0;27.1)           | 0.62<br>0.94         |
| rs7199991             | AA<br>AC<br>CC   | -29.9                                                    | 7.8 (-9.8;25.4)<br>16.5 (-7.0;40.0)        | 0.39<br>0.17     | -15.0               | <b>-13.5 (-25.0;-1.9)</b><br>-5.1 (-20.6;10.4)         | <b>0.023*</b><br>0.52          | 14.9                                    | <b>-21.3 (-41.3;-1.2)</b><br>-21.7 (-48.8;5.4) | <b>0.04*</b><br>0.12 |
| rs7186053             | GG<br>GA<br>AA   | -25.8                                                    | -1.7 (-18.4;15.0)<br>-6.1 (-29.5;17.3)     | 0.84<br>0.61     | -8.7                | <b>-16.7 (-28.2;-5.1)</b><br>-13.7 (-28.8;1.5)         | <b>0.005*</b><br>0.08          | 17.1                                    | -15.0 (-34.6;4.6)<br>-7.6 (-34.5;19.3)         | 0.13<br>0.58         |
| rs10431924            | CC<br>CT<br>TT   | -25.8                                                    | -2.7 (-20.5;15.1)<br>-6.0 (-27.6;15.6)     | 0.76<br>0.58     | -14.0               | -4.6 (-18.1;8.9)<br>-12.1 (-26.7;2.5)                  | 0.51<br>0.10                   | 11.8                                    | -1.9 (-23.3;19.5)<br>-6.1 (-31.0;18.7)         | 0.86<br>0.63         |
| rs4783573             | AA<br>AG<br>GG   | -24.9                                                    | -2.9 (-18.9;13.1)<br>10.1 (-15.2;35.5)     | 0.43<br>0.98     | -20.7               | 4.7 (-6.8;16.2)<br>19.2 (-1.5;39.8)                    | 0.43<br>0.07                   | 4.3                                     | 7.6 (-11.4;26.5)<br>9.0 (-22.6;40.6)           | 0.43<br>0.58         |

|            |                |       |                                         |              |       |                                                  |                                |      |                                       |              |
|------------|----------------|-------|-----------------------------------------|--------------|-------|--------------------------------------------------|--------------------------------|------|---------------------------------------|--------------|
| rs7188750  | GG<br>GA/AA    | -25.8 | 0.4 (-20.7;21.6)                        | 0.97         | -19.2 | 5.6 (-6.6;17.7)                                  | 0.37                           | 6.6  | 5.2 (-18.2;28.5)                      | 0.66         |
| rs8056633  | TT<br>TG<br>GG | -28.3 | 6.5 (-10.6;23.6)<br>6.2 (-18.5;30.8)    | 0.46<br>0.62 | -23.0 | 8.6 (-3.9;21.1)<br><b>27.2 (14.2;40.3)</b>       | 0.18<br><b>&lt;0.001</b>       | 5.3  | 2.2 (-18.1;22.3)<br>21.1 (-5.6;47.7)  | 0.84<br>0.12 |
| rs4783689  | CC<br>CT<br>TT | -21.6 | -4.8 (-23.6;14.0)<br>-8.3 (-29.2;12.5)  | 0.62<br>0.43 | -13.6 | -6.4 (-20.9;8.1)<br>-4.1 (-20.5;12.3)            | 0.39<br>0.62                   | 7.9  | -1.6 (-24.8;21.5)<br>4.2 (-21.8;30.2) | 0.89<br>0.75 |
| rs16958383 | GG<br>GA<br>AA | -25.3 | -10.8 (-30.2;8.6)<br>4.4 (-28.1;36.9)   | 0.27<br>0.79 | -20.4 | 10.5 (-2.1;23.2)<br><b>36.6(11.9;61.3)</b>       | 0.10<br><b>0.004*</b>          | 4.9  | 21.4 (-0.8;43.5)<br>32.2 (-6.4;70.8)  | 0.06<br>0.10 |
| rs2276330  | TT<br>TC/CC    | -25.4 | -11.1 (-34.9;12.8)                      | 0.36         | -19.1 | 6.7 (-6.3;19.6)                                  | 0.31                           | 6.2  | 17.7 (-8.1;43.6)                      | 0.18         |
| rs1801552  | CC<br>CT<br>TT | -27.5 | 5.9 (-12.9;24.7)<br>1.2 (-26.9;29.2)    | 0.54<br>0.94 | -15.0 | -7.5 (-25.8;10.9)<br>-7.2 (-18.5;4.1)            | 0.44<br>0.21                   | 12.5 | -13.4 (-34.9;8.1)<br>-86 (-40.6;23.9) | 0.22<br>0.61 |
| rs3785078  | AA<br>AC/CC    | -24.4 | -10.6 (-28.6;7.4)                       | 0.25         | -20.0 | 10.5 (-1.9;22.9)                                 | 0.10                           | 4.3  | <b>21.1 (0.4;41.8)</b>                | <b>0.05</b>  |
| rs7203904  | GG<br>GC<br>CC | -24.6 | -3.9 (-20.8;13.1)<br>6.0 (-21.4;33.5)   | 0.66<br>0.67 | -22.3 | 1.7 (-9.7;13.0)<br><b>27.4 (13.4;41.4)</b>       | 0.78<br><b>&lt;0.001</b>       | 2.3  | 5.5 (-14.1;25.2)<br>21.4 (-8.6;51.3)  | 0.58<br>0.16 |
| rs17690554 | CC<br>CG<br>GG | -25.3 | -2.2 (-18.8;14.5)<br>20.2 (-37.2;77.61) | 0.80<br>0.49 | -23.5 | <b>15.3 (4.0;26.6)</b><br><b>26.9 (7.2;46.5)</b> | <b>0.008*</b><br><b>0.007*</b> | 1.8  | 17.4 (-1.5;36.2)<br>6.7 (-51.4;64.7)  | 0.07<br>0.82 |

\*p value<0.05, #Difference=interaction of ICS with SNP, FEV<sub>1</sub>=forced expiratory volume in one second, WT=wild types

**Table E6.1: Associations of *CDH1* genotypes with FEV<sub>1</sub>/VC post bronchodilator in ICS and no ICS group in population 1**

| <i>CDH1</i> gene SNPs |       | FEV <sub>1</sub> /VC post bronchodilator population 1 (%) |               |      |             |                     |              |                                         |               |      |
|-----------------------|-------|-----------------------------------------------------------|---------------|------|-------------|---------------------|--------------|-----------------------------------------|---------------|------|
|                       |       | no ICS                                                    |               |      | ICS         |                     |              | Difference (ICS vs no ICS) <sup>#</sup> |               |      |
|                       |       | B                                                         | 95% CI        | P    | B           | 95% CI              | P            | B                                       | 95% CI        | P    |
| rs2902185             | TC/CC | -0.59                                                     | (-6.30;5.11)  | 0.84 | -6.25       | (-13.47;0.98)       | 0.09         | -5.65                                   | (-14.73;3.42) | 0.22 |
| rs11075699            | AG    | -1.37                                                     | (-5.91;3.17)  | 0.55 | 3.67        | (-1.48;8.82)        | 0.16         | 5.03                                    | (-1.76;11.83) | 0.15 |
|                       | GG    | -3.05                                                     | (-8.97;2.87)  | 0.31 | 2.32        | (-3.76;8.40)        | 0.45         | 5.37                                    | (-3.11;13.85) | 0.21 |
| rs1125557             | AG    | 2.51                                                      | (-2.08;7.11)  | 0.28 | 1.01        | (-4.09;6.11)        | 0.70         | -1.50                                   | (-8.41;5.40)  | 0.67 |
|                       | GG    | 4.36                                                      | (-1.86;10.57) | 0.17 | -1.74       | (-7.83;4.36)        | 0.57         | -6.09                                   | (-14.76;2.58) | 0.17 |
| rs12597188            | GA/AA | 3.11                                                      | (-0.91;7.13)  | 0.13 | 0.39        | (-4.22;4.99)        | 0.87         | -2.72                                   | (-8.79;3.34)  | 0.38 |
| rs7199991             | AC/CC | 1.80                                                      | (-3.30;6.90)  | 0.49 | 0.53        | (-4.69;5.75)        | 0.84         | -1.27                                   | (-8.56;6.02)  | 0.73 |
| rs7186053             | GA/AA | 2.86                                                      | (-1.36;7.07)  | 0.18 | 1.01        | (-3.76;5.77)        | 0.68         | -1.85                                   | (-8.22;4.53)  | 0.57 |
| rs10431924            | CT    | 3.94                                                      | (-0.87;8.76)  | 0.11 | 4.68        | (-0.51;9.86)        | 0.08         | 0.73                                    | (-6.37;7.83)  | 0.84 |
|                       | TT    | 2.61                                                      | (-3.49;8.72)  | 0.40 | -1.57       | (-7.61;4.47)        | 0.61         | -4.19                                   | (-12.72;4.35) | 0.33 |
| rs4783573             | AG/GG | -1.37                                                     | (-5.32;2.59)  | 0.50 | 0.30        | (-4.43;5.02)        | 0.90         | 1.66                                    | (-4.58;7.91)  | 0.60 |
| rs7188750             | GA/AA | -2.52                                                     | (-7.90;2.85)  | 0.35 | 2.61        | (-2.73;7.96)        | 0.33         | 5.14                                    | (-2.47;12.74) | 0.18 |
| rs8056633             | TG    | -0.62                                                     | (-4.63;3.40)  | 0.76 | -1.81       | (-6.42;2.80)        | 0.44         | -1.19                                   | (-7.31;4.93)  | 0.70 |
|                       | GG    | 1.21                                                      | (-9.11;11.53) | 0.82 | 9.29        | (-0.94;19.53)       | 0.07         | 8.08                                    | (-6.57;22.73) | 0.28 |
| rs4783689             | CT    | 2.73                                                      | (-1.61;7.07)  | 0.22 | -4.40       | (-10.29;1.49)       | 0.14         | -7.13                                   | (-14.44;0.18) | 0.06 |
|                       | TT    | 0.40                                                      | (-4.87;5.66)  | 0.88 | -5.99       | (-13.45;1.47)       | 0.11         | -6.39                                   | (-15.67;2.90) | 0.18 |
| rs16958383            | GA/AA | 0.41                                                      | (-3.88;4.70)  | 0.85 | 0.53        | (-4.27;5.33)        | 0.83         | 0.12                                    | (-6.34;6.58)  | 0.97 |
| rs2276330             | TC/CC | -3.86                                                     | (-9.61;1.88)  | 0.18 | 3.63        | (-2.03;9.29)        | 0.21         | 7.49                                    | (-0.72;15.70) | 0.07 |
| rs1801552             | CT/TT | -0.26                                                     | (-5.48;4.96)  | 0.92 | 1.42        | (-3.80;6.65)        | 0.59         | 1.68                                    | (-5.63;9.00)  | 0.65 |
| rs3785078             | AC/CC | -0.80                                                     | (-5.71;4.11)  | 0.75 | 1.92        | (-3.07;6.92)        | 0.45         | 2.72                                    | (-4.24;9.69)  | 0.44 |
| rs7203904             | GC    | 0.28                                                      | (-3.68;4.23)  | 0.89 | -2.16       | (-6.79;2.47)        | 0.36         | -2.44                                   | (-8.54;3.67)  | 0.43 |
|                       | CC    | -1.18                                                     | (-10.24;7.88) | 0.80 | <b>8.95</b> | <b>(0.82;17.08)</b> | <b>0.03*</b> | 10.13                                   | (-2.19;22.45) | 0.11 |
| rs17690554            | CG/GG | -1.87                                                     | (-6.03;2.30)  | 0.38 | 2.17        | (-2.34;6.67)        | 0.34         | 4.03                                    | (-2.11;10.17) | 0.20 |

\*p value<0.05, <sup>#</sup>Difference= interaction of ICS with SNP, FEV<sub>1</sub>= forced expiratory volume in one second, VC= vital capacity

**Table E6.2: Associations of *CDH1* genotypes with FEV<sub>1</sub>/VC post bronchodilator in ICS and no ICS group in population 2**

| <i>CDH1</i> gene SNPs |       | FEV <sub>1</sub> /VC post bronchodilator population 2 (%) |               |      |             |                     |                   |                                         |                     |                   |
|-----------------------|-------|-----------------------------------------------------------|---------------|------|-------------|---------------------|-------------------|-----------------------------------------|---------------------|-------------------|
|                       |       | no ICS                                                    |               |      | ICS         |                     |                   | Difference (ICS vs no ICS) <sup>#</sup> |                     |                   |
|                       |       | B                                                         | 95% CI        | P    | B           | 95% CI              | P                 | B                                       | 95% CI              | P                 |
| rs2902185             | TC/CC | -0.08                                                     | (-4.63;4.48)  | 0.97 | -4.63       | (-9.52;0.27)        | 0.06              | -4.55                                   | (-11.24;2.15)       | 0.18              |
| rs11075699            | AG    | -0.69                                                     | (-5.51;4.12)  | 0.78 | 2.55        | (-1.85;6.96)        | 0.26              | 3.25                                    | (-3.25;9.74)        | 0.33              |
|                       | GG    | -3.45                                                     | (-9.25;2.34)  | 0.24 | -0.18       | (-5.42;5.05)        | 0.95              | 3.27                                    | (-4.54;11.09)       | 0.41              |
| rs1125557             | AG    | 1.16                                                      | (-3.21;5.52)  | 0.60 | 1.69        | (-2.59;5.96)        | 0.44              | 0.53                                    | (-5.51;6.57)        | 0.86              |
|                       | GG    | 3.79                                                      | (-2.54;10.12) | 0.24 | -4.18       | (-9.57;1.20)        | 0.13              | -7.97                                   | (-16.28;0.33)       | 0.06              |
| rs12597188            | GA    | 2.18                                                      | (-1.96;6.32)  | 0.30 | 1.17        | (-3.02;5.37)        | 0.58              | -1.01                                   | (-6.88;4.85)        | 0.73              |
|                       | AA    | 0.21                                                      | (-6.67;7.09)  | 0.95 | -0.75       | (-6.03;4.54)        | 0.78              | -0.96                                   | (-9.68;7.77)        | 0.83              |
| rs7199991             | AC/CC | 1.10                                                      | (-2.82;5.01)  | 0.58 | 0.89        | (-3.07;4.84)        | 0.66              | -0.21                                   | (-5.74;5.31)        | 0.94              |
| rs7186053             | GA    | 1.78                                                      | (-2.32;5.89)  | 0.39 | -2.16       | (-6.25;1.93)        | 0.30              | -3.94                                   | (-9.71;1.83)        | 0.18              |
|                       | AA    | -0.86                                                     | (-6.90;5.18)  | 0.78 | -4.59       | (-9.98;0.80)        | 0.09              | -3.73                                   | (-11.77;4.31)       | 0.36              |
| rs10431924            | CT    | 1.39                                                      | (-2.92;5.70)  | 0.53 | -1.45       | (-5.89;2.99)        | 0.52              | -2.84                                   | (-8.99;3.31)        | 0.36              |
|                       | TT    | 0.20                                                      | (-5.62;6.01)  | 0.95 | -1.82       | (-6.99;3.35)        | 0.49              | -2.02                                   | (-9.73;5.70)        | 0.61              |
| rs4783573             | AG    | -3.22                                                     | (-7.35;0.91)  | 0.13 | 3.58        | (-0.39;7.55)        | 0.08              | <b>6.80</b>                             | <b>(1.09;12.51)</b> | <b>0.02*</b>      |
|                       | GG    | -2.76                                                     | (-8.67;3.15)  | 0.36 | <b>8.36</b> | <b>(1.38;15.35)</b> | <b>0.02*</b>      | <b>11.12</b>                            | <b>(1.98;20.27)</b> | <b>0.02*</b>      |
| rs7188750             | GA/AA | -1.84                                                     | (-6.00;2.31)  | 0.38 | <b>5.19</b> | <b>(0.70;9.69)</b>  | <b>0.02*</b>      | <b>7.03</b>                             | <b>(0.95;13.12)</b> | <b>0.02*</b>      |
| rs8056633             | TG/GG | -2.89                                                     | (-6.67;0.88)  | 0.13 | <b>7.14</b> | <b>(3.33;10.94)</b> | <b>&lt;0.001*</b> | <b>10.03</b>                            | <b>(4.64;15.41)</b> | <b>&lt;0.001*</b> |
| rs4783689             | CT    | -0.39                                                     | (-4.97;4.20)  | 0.87 | -3.54       | (-8.17;1.08)        | 0.13              | -3.16                                   | (-9.69;3.37)        | 0.34              |
|                       | TT    | -0.22                                                     | (-5.58;5.15)  | 0.94 | -4.67       | (-9.95;0.61)        | 0.08              | -4.45                                   | (-11.96;3.05)       | 0.24              |
| rs16958383            | GA/AA | -0.81                                                     | (-5.04;3.41)  | 0.70 | <b>5.50</b> | <b>(1.09;9.91)</b>  | <b>0.01*</b>      | <b>6.31</b>                             | <b>(0.23;12.39)</b> | <b>0.042*</b>     |
| rs2276330             | TC/CC | -0.84                                                     | (-5.24;3.56)  | 0.71 | 4.48        | (-0.43;9.39)        | 0.07              | 5.32                                    | (-1.23;11.87)       | 0.11              |
| rs1801552             | CT/TT | 2.21                                                      | (-1.62;6.05)  | 0.26 | 0.88        | (-3.03;4.79)        | 0.66              | -1.34                                   | (-6.83;4.16)        | 0.63              |
| rs3785078             | AC/CC | -1.64                                                     | (-5.96;2.67)  | 0.45 | <b>6.07</b> | <b>(1.68;10.45)</b> | <b>0.01*</b>      | -1.34                                   | (-6.83;4.16)        | 0.63              |
| rs7203904             | GC    | -2.45                                                     | (-6.48;1.57)  | 0.23 | <b>5.14</b> | <b>(1.12;9.17)</b>  | <b>0.01*</b>      | <b>7.60</b>                             | <b>(1.88;13.31)</b> | <b>0.01*</b>      |
|                       | CC    | -3.24                                                     | (-9.76;3.28)  | 0.33 | <b>9.84</b> | <b>(3.08;16.59)</b> | <b>&lt;0.001*</b> | <b>13.08</b>                            | <b>(3.71;22.45)</b> | <b>0.01*</b>      |
| rs17690554            | CG/GG | -2.63                                                     | (-6.37;1.11)  | 0.17 | <b>7.45</b> | <b>(3.66;11.24)</b> | <b>&lt;0.001*</b> | <b>10.08</b>                            | <b>(4.77;15.40)</b> | <b>&lt;0.001*</b> |



\*p value<0.05, #Difference= interaction of ICS with SNP, FEV<sub>1</sub>= forced expiratory volume in one second, VC= vital capacity
